# Supplementary material
Source: PubMed Central journal article supplement (PMC5838710)
Supplement: jamasurg-153-1378-s001.pdf [file jamasurg-153-1378-s001.pdf]

## Supplementary Online Content

Chen EY, Marcantonio A, Torretta P III. Correlation between 24-hour pre-discharge opioid use and amount of opioids prescribed at hospital discharge.

*JAMA Surg.* Published online December 13, 2017.

doi:10.1001/jamasurg.2017.4859

**eTable.** Demographics, Opioid Consumption, and Prescription by Hospital

This supplementary material has been provided by the authors to give readers additional information about their work.

**eTable.** Demographics, Opioid Consumption, and Prescription by Hospital

|                                 | Post-op Length of Stay > 24 hrs | No opioids within 24 hrs pre-discharge | Not over-prescribed | Potential over-prescription | p-value (Not over-prescribed vs. Potential over-prescription ) |
|---------------------------------|---------------------------------|----------------------------------------|---------------------|-----------------------------|----------------------------------------------------------------|
| <b>Demographics</b>             |                                 |                                        |                     |                             |                                                                |
| Patients, No.                   | 18,343                          | 6,548                                  | 3,691               | 2,988                       | < 0.001                                                        |
| BMC                             | 9,795                           | 2,579                                  | 1,395               | 1,229                       | < 0.001                                                        |
| LHMC-B                          | 8,548                           | 3,969                                  | 2,296               | 1,759                       | < 0.001                                                        |
| <i>p-value (BMC vs. LHMC-B)</i> | < 0.001                         | < 0.001                                | < 0.001             | < 0.001                     |                                                                |
| Admissions, No.                 | 20,035                          | 6,981                                  | 3,930               | 3,051                       | < 0.001                                                        |
| BMC                             | 10,574                          | 2,702                                  | 1,458               | 1,244                       | < 0.001                                                        |
| LHMC-B                          | 9,461                           | 4,279                                  | 2,472               | 1,807                       | < 0.001                                                        |
| <i>p-value (BMC vs. LHMC-B)</i> | < 0.001                         | < 0.001                                | < 0.001             | < 0.001                     |                                                                |
| Surgical procedures, No.        | 21,452                          | 7,607                                  | 4,346               | 3,261                       | < 0.001                                                        |
| BMC                             | 11,292                          | 2,933                                  | 1,602               | 1,331                       | < 0.001                                                        |
| LHMC-B                          | 10,160                          | 4,674                                  | 2,744               | 1,930                       | < 0.001                                                        |
| <i>p-value (BMC vs. LHMC-B)</i> | < 0.001                         | < 0.001                                | < 0.001             | < 0.001                     |                                                                |
| Age, mean (range), y            | 52.2 (0 - 101)                  | 58.6 (0 - 101)                         | 59.7 (0 - 101)      | 57.4 (4 - 100)              | < 0.001                                                        |
| BMC                             | 44.7 (0 - 97)                   | 47.2 (0 - 97)                          | 46.5 (0 - 94)       | 48.1 (4 - 97)               | 0.05                                                           |
| LHMC-B                          | 61.1 (15 - 101)                 | 66.2 (16 - 101)                        | 68 (16 - 101)       | 63.9 (16 - 100)             | < 0.001                                                        |
| <i>p-value (BMC vs. LHMC-B)</i> | < 0.001                         | < 0.001                                | < 0.001             | < 0.001                     |                                                                |
| Male sex, No. (%)               | 8274 (45%)                      | 3463 (53%)                             | 2068 (56%)          | 1475 (49%)                  | < 0.001                                                        |
| BMC                             | 3651 (37%)                      | 1131 (44%)                             | 702 (50%)           | 454 (37%)                   | < 0.001                                                        |
| LHMC-B                          | 4623 (54%)                      | 2332 (59%)                             | 1366 (59%)          | 1021 (58%)                  | 0.31                                                           |
| <i>p-value (BMC vs. LHMC-B)</i> | < 0.001                         | < 0.001                                | < 0.001             | < 0.001                     |                                                                |
| Body mass index, mean (range)   | 29.8 (9.8 - 80)                 | 28.5 (9.8 - 80)                        | 27.9 (9.8 - 70.5)   | 29.3 (12.9 - 80)            | < 0.001                                                        |
| BMC                             | 30.3 (9.8 - 80)                 | 28.3 (9.8 - 80)                        | 26.8 (9.8 - 68.5)   | 29.9 (13.3 - 80)            | < 0.001                                                        |
| LHMC-B                          | 29.2 (11.3 - 70.5)              | 28.7 (11.3 - 70.5)                     | 28.5 (11.3 - 70.5)  | 28.8 (12.9 - 64.9)          | 0.13                                                           |
| <i>p-value (BMC vs. LHMC-B)</i> | < 0.001                         | 0.0305                                 | < 0.001             | < 0.001                     |                                                                |
| Medicaid or uninsured, No. (%)  | 6343 (35%)                      | 1632 (25%)                             | 877 (24%)           | 778 (26%)                   | 0.01                                                           |

|                                                       |                     |                     |                     |                     |         |
|-------------------------------------------------------|---------------------|---------------------|---------------------|---------------------|---------|
| BMC                                                   | 5758 (59%)          | 1432 (56%)          | 763 (55%)           | 688 (56%)           | 0.79    |
| LHMC-B                                                | 585 (7%)            | 200 (5%)            | 114 (5%)            | 90 (5%)             | 0.54    |
| <i>p-value (BMC vs. LHMC-B)</i>                       | < 0.001             | < 0.001             | < 0.001             | < 0.001             |         |
| Median income by ZIP code (in 1000), mean (range), \$ | \$48 (\$19 - \$175) | \$51 (\$19 - \$139) | \$52 (\$22 - \$139) | \$50 (\$19 - \$139) | < 0.001 |
| BMC                                                   | \$41 (\$22 - \$139) | \$40 (\$23 - \$139) | \$41 (\$23 - \$121) | \$40 (\$23 - \$139) | 0.47    |
| LHMC-B                                                | \$57 (\$19 - \$175) | \$58 (\$19 - \$139) | \$59 (\$22 - \$139) | \$57 (\$19 - \$139) | 0.006   |
| <i>p-value (BMC vs. LHMC-B)</i>                       | < 0.001             | < 0.001             | < 0.001             | < 0.001             |         |
| Distance to hospital, mean (range), km                | 60 (0.6 - 5,044)    | 61 (0.6 - 4,985)    | 59 (0.6 - 4,976)    | 63 (1.1 - 4,985)    | 0.49    |
| BMC                                                   | 43 (1.1 - 4,977)    | 40 (1.1 - 4,770)    | 41 (1.1 - 4,674)    | 39 (1.1 - 4,770)    | 0.77    |
| LHMC-B                                                | 82 (0.6 - 5,044)    | 75 (0.6 - 4,985)    | 70 (0.6 - 4,976)    | 81 (2.1 - 4,985)    | 0.23    |
| <i>p-value (BMC vs. LHMC-B)</i>                       | < 0.001             | < 0.001             | < 0.001             | < 0.001             |         |
| Procedures with regional/epidural anesthesia, No. (%) | 3117 (15%)          | 625 (8%)            | 212 (5%)            | 413 (13%)           | < 0.001 |
| BMC                                                   | 2219 (20%)          | 424 (14%)           | 118 (7%)            | 306 (23%)           | < 0.001 |
| LHMC-B                                                | 898 (9%)            | 201 (4%)            | 94 (3%)             | 107 (6%)            | < 0.001 |
| <i>p-value (BMC vs. LHMC-B)</i>                       | < 0.001             | < 0.001             | < 0.001             | < 0.001             |         |
| Length of procedure, mean (range), min                | 143 (0 - 1,437)     | 129 (1 - 1,437)     | 95 (1 - 1,437)      | 175 (1 - 778)       | < 0.001 |
| BMC                                                   | 111 (1 - 788)       | 92 (1 - 778)        | 71 (1 - 668)        | 118 (1 - 778)       | < 0.001 |
| LHMC-B                                                | 179 (0 - 1,437)     | 152 (1 - 1,437)     | 108 (1 - 1,437)     | 214 (9 - 776)       | < 0.001 |
| <i>p-value (BMC vs. LHMC-B)</i>                       | < 0.001             | < 0.001             | < 0.001             | < 0.001             |         |
| Length of stay, mean (range), d                       | 5 (1 - 302.4)       | 5.7 (1 - 302.4)     | 6.1 (1 - 302.4)     | 5.2 (1 - 200)       | < 0.001 |
| BMC                                                   | 5.3 (1 - 302.4)     | 6.8 (1 - 302.4)     | 7.9 (1 - 302.4)     | 5.6 (1 - 200)       | < 0.001 |
| LHMC-B                                                | 4.6 (1.1 - 70.8)    | 5 (1.1 - 70.8)      | 5 (1.1 - 70.8)      | 5 (1.1 - 50.9)      | 0.61    |
| <i>p-value (BMC vs. LHMC-B)</i>                       | < 0.001             | < 0.001             | < 0.001             | 0.01                |         |
| Length of stay after surgery, mean (range), d         | 4.4 (1 - 294.4)     | 4.9 (1 - 294.4)     | 5 (1 - 294.4)       | 4.8 (1 - 200)       | 0.38    |
| BMC                                                   | 4.9 (1 - 294.4)     | 6.6 (1 - 294.4)     | 7.4 (1 - 294.4)     | 5.6 (1 - 200)       | < 0.001 |
| LHMC-B                                                | 3.8 (1 - 48)        | 3.9 (1 - 48)        | 3.6 (1 - 48)        | 4.3 (1 - 42.1)      | < 0.001 |
| <i>p-value (BMC vs. LHMC-B)</i>                       | < 0.001             | < 0.001             | < 0.001             | < 0.001             |         |
| <b>Opioid Consumption and Prescription</b>            |                     |                     |                     |                     |         |
| Discharges home with opioids                          | 14,652              | 3,051               | 0                   | 3,051               | < 0.001 |
| BMC                                                   | 8,119               | 1,244               | 0                   | 1,244               | < 0.001 |
| LHMC-B                                                | 6,533               | 1,807               | 0                   | 1,807               | < 0.001 |
| <i>p-value (BMC vs. LHMC-B)</i>                       | < 0.001             | 0.0018              | NA                  | NA                  |         |

|                                                 |                  |                  |                 |                   |         |
|-------------------------------------------------|------------------|------------------|-----------------|-------------------|---------|
| 24-hours pre-discharge opioid utilization (MME) | 33 (0 - 1,365)   | 0 (0 - 0)        | 0 (0 - 0)       | 0 (0 - 0)         | NA      |
| BMC                                             | 40 (0 - 1,365)   | 0 (0 - 0)        | 0 (0 - 0)       | 0 (0 - 0)         | NA      |
| LHMC-B                                          | 26 (0 - 600)     | 0 (0 - 0)        | 0 (0 - 0)       | 0 (0 - 0)         | NA      |
| <i>p</i> -value (BMC vs. LHMC-B)                | < 0.001          | NA               | NA              | NA                |         |
| Opioid discharge quantity (MME)                 | 343 (0 - 37,500) | 150 (0 - 13,500) | 0 (0 - 0)       | 343 (34 - 13,500) | < 0.001 |
| BMC                                             | 411 (0 - 37,500) | 190 (0 - 13,500) | 0 (0 - 0)       | 413 (38 - 13,500) | < 0.001 |
| LHMC-B                                          | 268 (0 - 10,800) | 124 (0 - 3,120)  | 0 (0 - 0)       | 294 (34 - 3,120)  | < 0.001 |
| <i>p</i> -value (BMC vs. LHMC-B)                | < 0.001          | < 0.001          | NA              | < 0.001           |         |
| Total opioids prescribed (MME)                  | 6,881,492        | 1,045,616        | 0               | 1,045,616         | < 0.001 |
| BMC                                             | 4,343,870        | 514,132          | 0               | 514,132           | < 0.001 |
| LHMC-B                                          | 2,537,621        | 531,484          | 0               | 531,484           | < 0.001 |
| <i>p</i> -value (BMC vs. LHMC-B)                | < 0.001          | < 0.001          | NA              | < 0.001           |         |
| Last opioid from surgery (post-op days)         | 3.4 (-20 - 122)  | 2.4 (-20 - 122)  | 2.2 (-20 - 122) | 2.6 (-8.5 - 106)  | 0.01    |
| BMC                                             | 4 (-20 - 122)    | 4.1 (-20 - 122)  | 5 (-20 - 122)   | 3.3 (-8.5 - 106)  | < 0.001 |
| LHMC-B                                          | 2.6 (-10 - 45)   | 1.5 (-10 - 32)   | 1 (-10 - 31)    | 2.1 (-3.4 - 32)   | < 0.001 |
| <i>p</i> -value (BMC vs. LHMC-B)                | < 0.001          | < 0.001          | < 0.001         | < 0.001           |         |
| Last opioid from discharge (days)               | -1 (-172 - 0)    | -2.7 (-172 - 0)  | -3.2 (-172 - 0) | -2.3 (-123 - 0)   | < 0.001 |
| BMC                                             | -0.8 (-172 - 0)  | -3.3 (-172 - 0)  | -4.4 (-172 - 0) | -2.4 (-123 - 0)   | < 0.001 |
| LHMC-B                                          | -1.2 (-33 - 0)   | -2.4 (-33 - 0)   | -2.6 (-33 - 0)  | -2.2 (-19 - 0)    | < 0.001 |
| <i>p</i> -value (BMC vs. LHMC-B)                | < 0.001          | < 0.001          | < 0.001         | 0.14              |         |

Data are presented in the form of “mean (min – max)” unless otherwise specified.
